# Supplementary material
Source: publisher site journal article supplement (https://www.dovepress.com/get_supplementary_file.php?f=418752.docx)
Supplement: Supplementary file 1 [file get_supplementary_file.php]

Table S1. Time from recurrence to last acute cholangitis in 161 patients.

| Re Time (d) |  |  |  |  |
| --- | --- | --- | --- | --- |
|  | Frequency | Percentage (%) | Effective percentage  (%) | Cumulative percentage  (%) |
| 1 | 10 | 2.0 | 6.2 | 6.2 |
| 2 | 10 | 2.0 | 6.2 | 12.4 |
| 3 | 7 | 1.4 | 4.3 | 16.8 |
| 4 | 3 | 0.6 | 1.9 | 18.6 |
| 5 | 5 | 1.0 | 3.1 | 21.7 |
| 6 | 8 | 1.6 | 5.0 | 26.7 |
| 7 | 3 | 0.6 | 1.9 | 28.6 |
| 8 | 1 | 0.2 | 0.6 | 29.2 |
| 9 | 1 | 0.2 | 0.6 | 29.8 |
| 10 | 1 | 0.2 | 0.6 | 30.4 |
| 11 | 1 | 0.2 | 0.6 | 31.1 |
| 12 | 23 | 4.6 | 14.3 | 45.3 |
| 13 | 1 | 0.2 | 0.6 | 46.0 |
| 18 | 2 | 0.4 | 1.2 | 47.2 |
| 20 | 1 | 0.2 | 0.6 | 47.8 |
| 24 | 15 | 3.0 | 9.3 | 57.1 |
| 36 | 13 | 2.6 | 8.1 | 65.2 |
| 48 | 5 | 1.0 | 3.1 | 68.3 |
| 60 | 7 | 1.4 | 4.3 | 72.7 |
| 70 | 1 | 0.2 | 0.6 | 73.3 |
| 72 | 8 | 1.6 | 5.0 | 78.3 |
| 84 | 4 | 0.8 | 2.5 | 80.7 |
| 96 | 5 | 1.0 | 3.1 | 83.9 |
| 108 | 6 | 1.2 | 3.7 | 87.6 |
| 120 | 6 | 1.2 | 3.7 | 91.3 |
| 132 | 1 | 0.2 | 0.6 | 91.9 |
| 144 | 1 | 0.2 | 0.6 | 92.5 |
| 192 | 1 | 0.2 | 0.6 | 93.2 |
| 216 | 1 | 0.2 | 0.6 | 93.8 |
| 240 | 5 | 1.0 | 3.1 | 96.9 |
| 276 | 1 | 0.2 | 0.6 | 97.5 |
| 336 | 1 | 0.2 | 0.6 | 98.1 |
| 360 | 3 | 0.6 | 1.9 | 100.0 |
|  | 161 | 32.0 | 100.0 |  |
|  | 342 | 68.0 |  |  |
|  | 503 | 100.0 |  |  |
